# Supplementary material for: Use of an external organic carbon source in the removal of nitrates in bio-sand filters (BSFs)
Source: Copernicus journal article supplement (doi:10.5194/dwes-10-119-2017), 2017-11-16
Supplement: Supplementary file 1 [file Data Sets.xlsx]

## Sheet: Flow rates
		Sampling interval (days)	BSF 1			BSF 2
			Start time, ts (min)	Time after 1 litre mark, t1l (min)	Flow Rate (l/min)	Start time, ts (min)	Time after 1 litre mark, t1l (min)	Flow Rate (l/min)
	2	0	0	1.39	0.74	0	1.36	0.735294
	2	2	0	1.42	0.704225	0	1.36	0.735294
	3	4	0	1.39	0.719424	0	1.37	0.729927
	2	6	0	1.37	0.729927	0	1.38	0.724638
	2	8	0	1.38	0.724638	0	1.37	0.729927
	3	10	0	1.38	0.724638	0	1.36	0.735294
	2	12	0	1.38	0.724638	0	1.37	0.729927
	2	14	0	1.37	0.729927	0	1.41	0.70922
	3	16	0	1.42	0.704225	0	1.42	0.704225
	2	18	0	1.44	0.694444	0	1.41	0.70922
	2	20	0	1.44	0.694444	0	1.44	0.694444
	3	22	0	1.46	0.684932	0	1.72	0.581395
	2	24	0	1.47	0.680272	0	1.75	0.571429
	2	26	0	1.49	0.671141	0	1.8	0.555556
	3	28	0	1.52	0.657895	0	1.85	0.540541
	2	30	0	1.52	0.657895	0	2	0.5
	2	32	0	1.53	0.653595	0	2.5	0.4
	3	34	0	1.54	0.649351	0	2.7	0.37037
	2	36	0	1.56	0.641026	0	2.8	0.357143
	2	38	0	1.65	0.606061	0	3.2	0.3125
	3	40	0	1.75	0.571429	0	3.6	0.277778
	2	42	0	1.8	0.555556	0	3.9	0.25641
	2	44	0	1.9	0.526316	0	4.3	0.232558
	2	46	0	2.5	0.4	0	4.9	0.204082

## Sheet: Mean Paramenters
		Sampling interval (days)	BSF1		BSF2
			Influent pH	Effluent pH	Influent pH	Effluent pH
		1	8.35	7.88	7.7	6.4
		3	8.4	7.5	7.7	6.5
		2	8.3	7.4	7.6	6.7
		2	8.32	7.6	7.5	6.7
		3	8.3	7.77	7.7	6.6
		2	8.4	7.65	7.65	6.6
		3	8.42	7.68	7.6	6.8
		Mean	8.35571	7.64	7.63571	6.61429
		Standard Deviation	0.00259524	0.0258333	0.00559524	0.0180952
			0.0509435	0.160728	0.0748013	0.134519
		Parameter	BSF1 (Control)		BSF2 (Ethanol Application @ C/N 1.1)
			Influent	Effluent	Influent	Effluent
		pH	8.36	7.64	7.64	6.61
		Temperature (oC)	19.76	20.29	19.73	19.84
		Dissolved Oxygen (mg/l)	7.06	4.06	8.19	3
		Nitrates (mg/l)	25	17.74	25	13.88
		Ethanol as COD (mg/l)	0	0	233.52	25.42

## Sheet: DO BSF1-2
			C/N = 1.1
		Sampling Interval (days)	BSF1		BSF2
			BSF1 Influent DO	BSF1 Effluent DO	BSF2 Influent DO	BSF2 Effluent DO
		1	6.2	3.6	7.32	2.8
		2	8.5	5.8	9.03	3.25
		5	7	4.5	8.16	2.91
		7	8.35	5.1	8.03	2.9
		9	6.22	3.42	8.35	3
		12	6.54	3.1	8.36	3.2
		14	6.61	2.9	8.11	2.95
		17	6.15	2.85	9.56	3.3
		20	6.53	3.1	8.03	2.85
		22	2.76	2.2	8.18	2.86
		24	6.1	3.6	7.66	2.84
		27	6.4	3.15	8.1	2.9
		29	2.46	2.1	7.85	2.87
		Mean	7.06	4.06	8.19429	3.00143
		Standard Deviation	0.943233	1.19853	0.258295	0.027181
			0.971202	1.09478	0.508228	0.164866

## Sheet: Temp BSF1-2
			C/N = 1.1
		Date of Sampling	BSF1		BSF2
			Influent Temp	Effluent Temp	Influent Temp	Effluent Temp
		Sampling Interval (days)	20	20.5	19.7	19.8
			19.5	20.6	19.8	19.8
		1	19.5	20.5	19.8	19.9
		2	19.5	20	19.7	19.9
		5	20	20	19.7	19.8
		7	20	20.2	19.8	19.9
		9	19.8	20.2	19.6	19.8
		12	19.8	20	19.7	19.7
		14	20.2	20	19.6	19.8
		17	20	20.5	19.7	19.8
		20	19.9	20.3	19.6	19.9
		22	19.9	20.3	19.8	19.8
		24	20	20.4	19.6	19.8
			19.7571	20.2857	19.7286	19.8429
		Standard Deviation	0.0628571	0.0614286	0.00571429	0.00285714
			0.250713	0.247848	0.0755929	0.0534522

## Sheet: ph Retention Time
				Average Influent pH	Average Effluent pH										Retention Time	Average Influent pH	Average Effluent pH
			Retention Time (hours)		1	1.5	2	2.5	3	4	5	6	12		1	8.12	6.95
				7.5	6.9	7	7	6.8	6.9	7	7.1	7.2	7.3		1.5	8.12	6.95
				7.6	7	7	6.8	6.9	7	7	7.2	7.4	7.5		2	8.12	6.9
				8.68	6.9	6.9	7	7	7.1	7.2	7.2	7.4	7.3		2.5	8.12	6.925
				8.7	7	6.9	6.8	7	7	7.2	7.3	7.3	7.4		3	8.12	7
			Mean	8.12	6.95	6.95	6.9	6.925	7	7.1	7.2	7.325	7.375		4	8.12	7.1
				0.434933	0.00333333	0.00333333	0.0133333	0.00916667	0.00666667	0.0133333	0.00666667	0.00916667	0.00916667		5	8.12	7.2
			Standard Deviation	0.659495	0.057735	0.057735	0.11547	0.0957427	0.0816497	0.11547	0.0816497	0.0957427	0.0957427		6	8.12	7.325
															12	8.12	7.375

## Sheet: Summary CN & COD
	Sampling interval	BSF at C/N=0		BSFC at C/N=1.1		BSFC at C/N=1.8
	(Days)
		Effluent Nitrate	Removal Efficiency	Effluent Nitrate	Removal Efficiency	Effluent Nitrate	Removal Efficiency
		(mg/l)		(mg/l)		(mg/l)
	1	19.21	0.23	15.55	0.378	14.21	0.4316
	2	19	0.24	14.95	0.402	13.08	0.4768
	5	18.75	0.25	14.9	0.404	13.01	0.4796
	7	16.25	0.35	14.81	0.4076	12.85	0.486
	9	16.5	0.34	14.74	0.4104	12.81	0.4876
	12	17	0.32	14.61	0.4156	12.75	0.49
	14	17.5	0.3	14.55	0.418	12.73	0.4908
	17	16	0.36	14.5	0.44	12.7	0.49
	20	16.32	0.35	14.5	0.42	11.75	0.53
	22	16.42	0.34	14.5	0.42	11.6	0.54
	24	16.3	0.35	13.5	0.46	11.5	0.54
	27	15.64	0.37	13	0.48	11.75	0.53
	29	15.73	0.37	12.65	0.49	11.9	0.52
	Sampling interval (Days)	Influent COD	Effluent COD	COD Removal Efficiency (%)	Influent COD	Effluent COD	COD Removal Efficiency (%)
		C/N = 1.1			C/N = 1.8
	1	233.52	26.85	88.5	382.12	34.62	90.94
	2	233.52	25.3	89.17	382.12	35.17	90.8
	5	233.52	25.61	89.03	382.12	35.98	90.58
	7	233.52	23.98	89.73	382.12	34.48	90.98
	9	233.52	24.77	89.39	382.12	35.96	90.59
	12	233.52	25.1	89.25	382.12	34.84	90.88
	14	233.52	26.36	88.71	382.12	34.46	90.98
	17	233.52	24.67	89.44	382.12	35.54	90.7
	20	233.52	26.46	88.67	382.12	36.1	90.55
	22	233.52	26.7	88.57	382.12	35.86	90.62
	24	233.52	26.55	88.63	382.12	35.42	90.73
	27	233.52	26.48	88.66	382.12	35.4	90.74
	29	233.52	26.22	88.77	382.12	35.18	90.79

## Sheet: Nitrate
			Average Influent Nitrate (mg/l)	Average Effluent Nitrate (mg/l)										Retention Time, t in hrs		Average Influent Nitrate (mg/l), C1	Average Effluent Nitrate (mg/l), C2	C1-C2	(C1-C2)t
		Retention Time (hours)		1	1.5	2	2.5	3	4	5	6	12		0	0	25	25	0	#DIV/0!
														1	1	25	16	9	9
			25	20.5	19	17.8	17.6	17.2	17	17	16.86	16.65	14.5	1.5	2.5	25	13.15	11.85	7.9
			25	21.1	19.8	18.1	17.9	16	15.8	15.4	14.9	13.76	12.65	2	4.5	25	12.425	12.575	6.2875
			25	20.72	6.9	7	7	7.1	7.2	7.2	7.4	7.3	11.6	2.5	7	25	11.9	13.1	5.24
			25	20.9	6.9	6.8	7	7	7.2	7.3	7.3	7.4	11.9	3	10	25	11.825	13.175	4.39167
		Mean	25	20.805	13.15	12.425	12.375	11.825	11.8	11.725	11.615	11.2775		4	14	25	11.8	13.2	3.3
			0	0.0654333	52.19	40.7225	38.5358	30.6425	28.4533	27.1292	24.8956	21.9607		5	19	25	11.725	13.275	2.655
		Standard Deviation	0	0.255799	7.22426	6.38142	6.20772	5.53557	5.33417	5.20857	4.98955	4.68622		6	25	25	11.615	13.385	2.23083
														12	37	25	11.2775	13.7225	1.14354

## Sheet: Combine CN
		Sampling Interval (days)	BSF1			BSF2
			Influent Nitrate	Effluent Nitrate	Removal Efficiency	Influent Nitrate	Effluent Nitrate	Removal Efficiency
	0	1	25	19.21	0.2316	25	15	0.4
	1	2	25	19	0.24	25	14	0.44
	3	5	25	18.75	0.25	25	14.5	0.42
	2	7	25	16.25	0.35	25	14.5	0.42
	2	9	25	16.5	0.34	25	13.5	0.46
	3	12	25	17	0.32	25	13	0.48
	2	14	25	17.5	0.3	25	12.65	0.494
	3	17	25	16	0.36	25	12.7	0.492
	3	20	25	16.32	0.3472	25	11.75	0.53
	2	22	25	16.42	0.3432	25	11.6	0.536
	2	24	25	16.3	0.348	25	11.5	0.54
	3	27	25	15.64	0.3744	25	11.75	0.53
	2	29	25	15.73	0.3708	25	11.9	0.524

## Sheet: Retention
				0.686	0.741	0.783	0.778	0.791	0.815	0.831	0.835	0.867	0.885
				160.195	173.038	182.846	181.679	184.714	190.319	194.055	194.989	202.462	206.665
			Average Influent COD (mg/l)	Average Effluent COD (mg/l)
				1	1.5	2	2.5	3	4	5	6	12
			233.52	73.3253	60.4817	50.6738	51.8414	48.8057	43.2012	39.4649	38.5308	31.0582
			233.52	71.02	61.52	51.9	51.3	49.56	43.02	39.25	38.94	30.4
		Mean	233.52	72.1726	61.0008	51.2869	51.5707	49.1828	43.1106	39.3574	38.7354	30.7291
			0	2.65716	0.539054	0.751734	0.146579	0.284499	0.0164167	0.0230867	0.0837223	0.216587
		Standard Deviation	0	1.63008	0.734203	0.867026	0.382856	0.533385	0.128128	0.151943	0.289348	0.465389
				0.744	0.792	0.826	0.82	0.835	0.851	0.864	0.867	0.893	0.907
				284.297	302.639	315.631	313.338	319.07	325.184	330.152	331.298	341.233	346.583
			Average Influent COD (mg/l)	Average Effluent COD (mg/l)
		Retention Time (hours)		1	1.5	2	2.5	3	4	5	6	12
			382.12	97.8227	79.481	66.4889	68.7816	63.0498	56.9359	51.9683	50.822	40.8868
			382.12	100.02	78.48	67.37	67.92	61.26	56.02	51.12	50.87	38.97
		Mean	382.12	98.9214	78.9805	66.9294	68.3508	62.1549	56.4779	51.5442	50.846	39.9284
			0	2.41402	0.50096	0.388186	0.371177	1.60169	0.419418	0.359823	0.00115392	1.83714
		Standard Deviation	0	1.55371	0.707786	0.623046	0.609243	1.26558	0.647625	0.599853	0.0339694	1.35541
		Retention Time	Average Effluent COD(mg/l)	Average Effluent COD(mg/l)
		0	382	233.5	25
		1	98.9214	72.1726	20.805
		1.5	78.9805	61.0008	13.15
		2	66.9294	51.2869	12.425
		2.5	68.3508	51.5707	12.375
		3	62.1549	49.1828	11.825
		4	56.4779	43.1106	11.8
		5	51.5442	39.3574	11.725
		6	50.846	38.7354	11.615
		12	39.9284	30.7291	11.2775
