# Supplementary material for: Use of an external organic carbon source in the removal of nitrates in bio-sand filters (BSFs)
Source: Copernicus journal article supplement (doi:10.5194/dwes-10-119-2017), 2017-11-16
Supplement: Supplementary file 1 [file dwes-10-119-2017-supplement.zip]

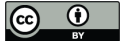

## *Supplement of*

# **Use of an external organic carbon source in the removal of nitrates in bio-sand filters (BSFs)**

**Crispen Mutsvangwa and Evans Matope**

*Correspondence to:* Crispen Mutsvangwa ([mutsvangwac@cput.ac.za](mailto:mutsvangwac@cput.ac.za))

- [dwes-10-119-2017-supplement-title-page.pdf](#)
- [Data Sets.xlsx](#)

The copyright of individual parts of the supplement might differ from the CC BY 4.0 License.
