# Supplementary material for: Use of an external organic carbon source in the removal of nitrates in bio-sand filters (BSFs)
Source: Copernicus journal article supplement (doi:10.5194/dwes-10-119-2017), 2017-11-16
Supplement: Supplementary file 2 [file dwes-10-119-2017-supplement.zip]

Archive with 2 entries (2 files):
- dwes-10-119-2017-supplement-title-page.pdf
- Data Sets.xlsx
